# Supplementary material for: Improving analytical performance for pesticides and mycotoxins determination in Brazilian table olives: one extraction and one analysis
Source: Royal Society of Chemistry journal article supplement (doi:10.1039/d4ay00576g), 2024-01-01
Supplement: d4ay00576g1.pdf [file d4ay00576g1.pdf]

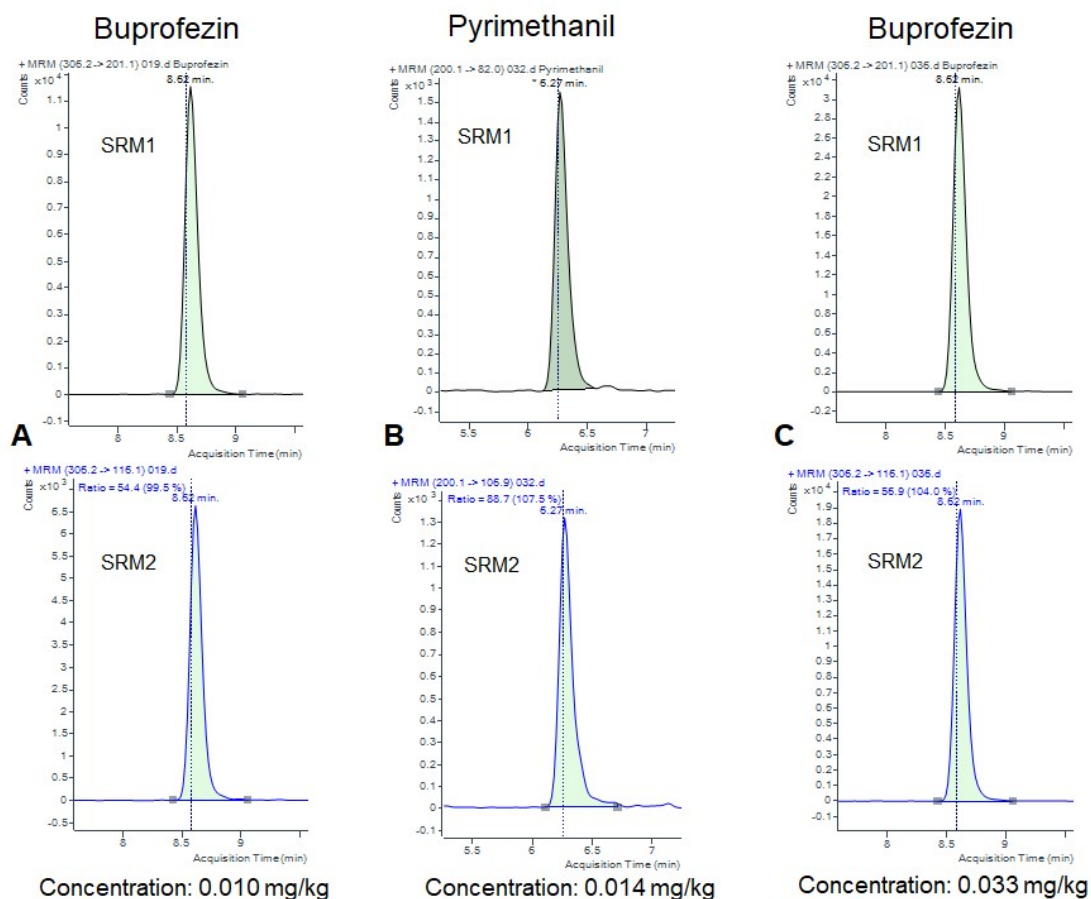

Fig. S1 Chromatograms of buprofezin and pyrimethanil obtained by LC-MS/MS analysis of positive table olive samples (A, B and C).
