# Supplementary material for: Improving analytical performance for pesticides and mycotoxins determination in Brazilian table olives: one extraction and one analysis
Source: Royal Society of Chemistry journal article supplement (doi:10.1039/d4ay00576g), 2024-01-01
Supplement: d4ay00576g2.pdf [file d4ay00576g2.pdf]

Table S1 Chromatographic and mass spectrometer condition of the compounds determined by LC-MS/MS triple quadrupole.

| Compound                | Retention time (min) | Precursor ion (m/z) | Fragmentor voltage (V) | Transitions              |                      |                          |                      | Ionization mode |
|-------------------------|----------------------|---------------------|------------------------|--------------------------|----------------------|--------------------------|----------------------|-----------------|
|                         |                      |                     |                        | Product ion (m/z) - SRM1 | Collision energy (V) | Product ion (m/z) - SRM2 | Collision energy (V) |                 |
| Acephate                | 1.64                 | 184.0               | 70                     | 49.1                     | 20                   | 143.0                    | 5                    | AJS ESI +       |
| Acetamiprid             | 2.04                 | 223.1               | 126                    | 90.0                     | 45                   | 125.8                    | 21                   | AJS ESI +       |
| Acetochlor              | 8.05                 | 270.1               | 120                    | 148.1                    | 17                   | 224.2                    | 9                    | AJS ESI +       |
| <i>Aflatoxin B1</i>     | 5.84                 | 313.1               | 96                     | 128.2                    | 89                   | 241.2                    | 41                   | AJS ESI +       |
| <i>Aflatoxin B2</i>     | 5.55                 | 315.1               | 136                    | 77.2                     | 117                  | 287.0                    | 29                   | AJS ESI +       |
| <i>Aflatoxin G1</i>     | 5.83                 | 329.1               | 96                     | 115.0                    | 89                   | 213.8                    | 41                   | AJS ESI +       |
| <i>Aflatoxin G2</i>     | 5.03                 | 331.1               | 96                     | 201.0                    | 41                   | 245.1                    | 33                   | AJS ESI +       |
| Aldicarbe sulfone       | 1.86                 | 240.1               | 65                     | 58.1                     | 37                   | 63.1                     | 37                   | AJS ESI +       |
| Aldicarbe sulfoxide     | 1.63                 | 207.1               | 111                    | 65.0                     | 16                   | 89.0                     | 12                   | AJS ESI +       |
| Atrazine                | 6.60                 | 216.1               | 125                    | 145.9                    | 20                   | 174.1                    | 16                   | AJS ESI +       |
| Azamethiphos            | 5.85                 | 325.0               | 120                    | 112.0                    | 40                   | 183.0                    | 10                   | AJS ESI +       |
| Azinphos-methyl         | 7.32                 | 318.0               | 86                     | 125.0                    | 24                   | 260.9                    | 4                    | AJS ESI +       |
| Azoxystrobin            | 7.49                 | 404.1               | 110                    | 329.1                    | 32                   | 372.1                    | 8                    | AJS ESI +       |
| Benfuracarb             | 9.10                 | 411.2               | 95                     | 162.1                    | 40                   | 252.1                    | 8                    | AJS ESI +       |
| Bifenazate              | 7.73                 | 301.2               | 81                     | 170.1                    | 24                   | 198.1                    | 4                    | AJS ESI +       |
| Bitertanol              | 7.92                 | 338.2               | 70                     | 99.1                     | 10                   | 269.3                    | 4                    | AJS ESI +       |
| Boscalid                | 7.76                 | 316.1               | 126                    | 165.0                    | 29                   | 247.1                    | 17                   | AJS ESI +       |
| Bromuconazol            | 7.55                 | 376.0               | 116                    | 122.8                    | 81                   | 158.8                    | 41                   | AJS ESI +       |
| Bupirimate              | 7.14                 | 317.2               | 125                    | 166.1                    | 33                   | 210.2                    | 20                   | AJS ESI +       |
| Buprofezin              | 8.54                 | 306.2               | 105                    | 201.1                    | 5                    | 116.1                    | 10                   | AJS ESI +       |
| Cadusaphos              | 8.61                 | 271.1               | 81                     | 130.7                    | 21                   | 158.9                    | 12                   | AJS ESI +       |
| Carbaryl                | 6.44                 | 202.1               | 65                     | 127.1                    | 28                   | 145.1                    | 4                    | AJS ESI +       |
| Carbendazim             | 1.65                 | 192.1               | 56                     | 132.1                    | 32                   | 160.1                    | 16                   | AJS ESI +       |
| Carbofuran              | 6.24                 | 222.1               | 80                     | 123.1                    | 30                   | 165.1                    | 20                   | AJS ESI +       |
| Carpropamid             | 8.31                 | 334.1               | 92                     | 76.9                     | 77                   | 102.9                    | 49                   | AJS ESI +       |
| Chlorfenvinphos         | 8.16                 | 358.9               | 105                    | 99.2                     | 28                   | 155.0                    | 8                    | AJS ESI +       |
| Chlorpyrifos-ethyl      | 9.36                 | 349.9               | 100                    | 97.0                     | 20                   | 198.0                    | 20                   | AJS ESI +       |
| Clofentezine            | 8.56                 | 303.0               | 110                    | 102.0                    | 40                   | 138.0                    | 12                   | AJS ESI +       |
| Clothianidin            | 2.45                 | 250.0               | 76                     | 131.8                    | 21                   | 169.1                    | 9                    | AJS ESI +       |
| Cyazofamid              | 8.13                 | 325.0               | 90                     | 108.0                    | 8                    | 261.0                    | 4                    | AJS ESI +       |
| Cyproconazole           | 7.32                 | 292.1               | 100                    | 89.0                     | 60                   | 125.0                    | 20                   | AJS ESI +       |
| Cyprodinil              | 7.20                 | 226.1               | 140                    | 91.1                     | 36                   | 133.1                    | 24                   | AJS ESI +       |
| <i>Citrinin</i>         | 6.89                 | 251.1               | 96                     | 90.9                     | 61                   | 115.0                    | 69                   | AJS ESI +       |
| Demeton-S-methylsulfone | 1.98                 | 263.0               | 95                     | 109.0                    | 24                   | 169.0                    | 12                   | AJS ESI +       |
| Diazinon                | 8.58                 | 305.1               | 105                    | 97.0                     | 40                   | 169.1                    | 32                   | AJS ESI +       |
| Dichlofluanid           | 7.60                 | 333.0               | 126                    | 123.0                    | 32                   | 224.0                    | 16                   | AJS ESI +       |
| Diethofencarb           | 7.39                 | 268.2               | 70                     | 124.0                    | 30                   | 226.1                    | 0                    | AJS ESI +       |
| Difenconazole           | 8.41                 | 406.1               | 120                    | 188.0                    | 40                   | 251.0                    | 20                   | AJS ESI +       |
| Diphenylamine           | 7.94                 | 170.1               | 116                    | 66.0                     | 49                   | 93.1                     | 29                   | AJS ESI +       |
| Diflubenzuron           | 7.74                 | 311.0               | 80                     | 141.0                    | 32                   | 158.0                    | 8                    | AJS ESI +       |
| Dimethoate              | 3.58                 | 230.0               | 70                     | 125.0                    | 16                   | 198.8                    | 0                    | AJS ESI +       |
| Dimethomorph            | 7.17                 | 388.1               | 145                    | 273.1                    | 32                   | 301.0                    | 24                   | AJS ESI +       |
| Diniconazole            | 8.13                 | 326.1               | 110                    | 70.0                     | 25                   | 159.0                    | 28                   | AJS ESI +       |
| Diuron                  | 6.65                 | 233.0               | 120                    | 72.0                     | 20                   | 160.1                    | 29                   | AJS ESI +       |
| Epoxiconazole           | 7.60                 | 330.1               | 126                    | 100.9                    | 40                   | 120.9                    | 21                   | AJS ESI +       |
| Ethion                  | 9.33                 | 385.0               | 95                     | 142.8                    | 24                   | 199.0                    | 12                   | AJS ESI +       |
| Ethirimol               | 1.66                 | 210.2               | 145                    | 98.0                     | 32                   | 140.1                    | 20                   | AJS ESI +       |
| Etofenprox              | 10.9                 | 394.2               | 100                    | 177.0                    | 5                    | 359.0                    | 5                    | AJS ESI +       |

Table S1 (continued)

| Compound                | Retention time (min) | Precursor ion (m/z) | Fragmentor voltage (V) | Transitions              |                      |                          |                      | Ionization mode |
|-------------------------|----------------------|---------------------|------------------------|--------------------------|----------------------|--------------------------|----------------------|-----------------|
|                         |                      |                     |                        | Product ion (m/z) - SRM1 | Collision energy (V) | Product ion (m/z) - SRM2 | Collision energy (V) |                 |
| Ethoprophos             | 7.77                 | 243.1               | 90                     | 97.0                     | 30                   | 130.9                    | 15                   | AJS ESI +       |
| Ethiprole               | 7.19                 | 397.0               | 96                     | 255.0                    | 44                   | 351.0                    | 20                   | AJS ESI +       |
| Etozazole               | 9.62                 | 360.2               | 91                     | 113.0                    | 60                   | 141.0                    | 32                   | AJS ESI +       |
| Fenamidone              | 7.53                 | 312.0               | 100                    | 92.2                     | 28                   | 236.2                    | 8                    | AJS ESI +       |
| Fenamiphos              | 7.48                 | 304.1               | 120                    | 217.1                    | 20                   | 234.0                    | 12                   | AJS ESI +       |
| Fenarimol               | 7.65                 | 331.0               | 130                    | 139.0                    | 36                   | 268.0                    | 20                   | AJS ESI +       |
| Fenzaquin               | 10.4                 | 307.2               | 105                    | 147.1                    | 16                   | 161.1                    | 10                   | AJS ESI +       |
| Fenbuconazole           | 7.77                 | 337.1               | 145                    | 70.0                     | 33                   | 125.1                    | 40                   | AJS ESI +       |
| Fenhexamid              | 7.64                 | 302.1               | 130                    | 55.1                     | 40                   | 97.1                     | 20                   | AJS ESI +       |
| Fenobucarb              | 7.31                 | 208.1               | 65                     | 95.0                     | 12                   | 152.1                    | 0                    | AJS ESI +       |
| Fenoxycarb              | 7.90                 | 302.1               | 90                     | 116.0                    | 17                   | 256.1                    | 8                    | AJS ESI +       |
| Fenpropimorph           | 6.16                 | 304.3               | 81                     | 132.0                    | 40                   | 147.0                    | 28                   | AJS ESI +       |
| Fenpyroximate           | 9.71                 | 422.2               | 135                    | 107.0                    | 64                   | 366.2                    | 12                   | AJS ESI +       |
| Fensulfothion           | 6.83                 | 309.0               | 106                    | 157.0                    | 28                   | 173.0                    | 24                   | AJS ESI +       |
| Fluazifop-butyl         | 9.09                 | 384.1               | 101                    | 282.0                    | 20                   | 328.0                    | 16                   | AJS ESI +       |
| Fludioxonil             | 7.31                 | 247.0               | 95                     | 126.0                    | 32                   | 169.0                    | 32                   | AJS ESI -       |
| Flufenoxuron            | 9.08                 | 489.0               | 100                    | 140.9                    | 56                   | 158.0                    | 20                   | AJS ESI +       |
| Fluquiconazole          | 7.70                 | 376.0               | 126                    | 272.2                    | 40                   | 348.9                    | 21                   | AJS ESI +       |
| Flusilazole             | 7.76                 | 316.1               | 120                    | 165.0                    | 24                   | 247.1                    | 12                   | AJS ESI +       |
| Flutolanil              | 7.85                 | 324.1               | 92                     | 92.9                     | 37                   | 144.9                    | 65                   | AJS ESI +       |
| Flutriafol              | 6.37                 | 302.1               | 126                    | 108.9                    | 40                   | 122.9                    | 33                   | AJS ESI +       |
| Fostiazato              | 6.49                 | 284.1               | 120                    | 103.9                    | 21                   | 227.9                    | 5                    | AJS ESI +       |
| Furalaxyl               | 7.35                 | 302.1               | 110                    | 95.0                     | 27                   | 242.1                    | 10                   | AJS ESI +       |
| Furathiocarb            | 9.14                 | 383.2               | 110                    | 167.0                    | 24                   | 195.0                    | 16                   | AJS ESI +       |
| Halofenozide            | 7.40                 | 331.1               | 76                     | 105.0                    | 23                   | 275.1                    | 0                    | AJS ESI +       |
| Haloxyfop-2-ethoxyethyl | 8.84                 | 434.1               | 111                    | 90.8                     | 45                   | 316.1                    | 17                   | AJS ESI +       |
| Hexaconazole            | 7.97                 | 314.1               | 95                     | 124.8                    | 40                   | 159.0                    | 30                   | AJS ESI +       |
| Hexythiazox             | 9.47                 | 353.1               | 115                    | 168.1                    | 24                   | 227.9                    | 8                    | AJS ESI +       |
| Imazalil                | 5.33                 | 297.1               | 115                    | 159.0                    | 20                   | 201.0                    | 15                   | AJS ESI +       |
| Imazapic                | 2.90                 | 276.1               | 126                    | 162.9                    | 29                   | 231.1                    | 21                   | AJS ESI +       |
| Imidacloprid            | 3.50                 | 256.0               | 80                     | 175.0                    | 12                   | 208.9                    | 12                   | AJS ESI +       |
| Indoxacarb              | 8.56                 | 528.1               | 126                    | 203.0                    | 45                   | 293.0                    | 13                   | AJS ESI +       |
| Iprovalicarb            | 7.44                 | 321.2               | 120                    | 115.9                    | 17                   | 203.1                    | 5                    | AJS ESI +       |
| Kresoxim-methyl         | 8.21                 | 314.1               | 85                     | 222.1                    | 10                   | 282.2                    | 0                    | AJS ESI +       |
| Linuron                 | 7.39                 | 249.0               | 120                    | 160.1                    | 20                   | 182.0                    | 17                   | AJS ESI +       |
| Malathion               | 7.85                 | 331.0               | 80                     | 99.0                     | 10                   | 126.9                    | 5                    | AJS ESI +       |
| Mecarbam                | 8.10                 | 330.0               | 70                     | 97.1                     | 45                   | 227.0                    | 15                   | AJS ESI +       |
| Mepanipyrim             | 7.80                 | 224.1               | 126                    | 192.1                    | 29                   | 207.9                    | 17                   | AJS ESI +       |
| Metalaxil               | 6.70                 | 280.2               | 120                    | 192.1                    | 17                   | 220.1                    | 10                   | AJS ESI +       |
| Metconazole             | 8.01                 | 320.1               | 130                    | 70.1                     | 24                   | 125.0                    | 48                   | AJS ESI +       |
| Methamidophos           | 1.62                 | 142.0               | 85                     | 94.0                     | 10                   | 125.0                    | 10                   | AJS ESI +       |
| Methidathion            | 7.35                 | 302.9               | 55                     | 85.1                     | 15                   | 145.0                    | 0                    | AJS ESI +       |
| Methiocarb              | 7.31                 | 226.1               | 70                     | 121.0                    | 11                   | 169.0                    | 6                    | AJS ESI +       |
| Methiocarb sulfone      | 4.83                 | 275.1               | 92                     | 77.0                     | 85                   | 121.8                    | 29                   | AJS ESI +       |
| Methiocarb sulfoxide    | 2.13                 | 242.1               | 86                     | 122.0                    | 33                   | 185.1                    | 9                    | AJS ESI +       |
| Methomyl                | 2.05                 | 163.1               | 50                     | 88.0                     | 0                    | 106.0                    | 4                    | AJS ESI +       |
| Methoxyfenozide         | 7.75                 | 369.2               | 85                     | 149.0                    | 10                   | 313.1                    | 0                    | AJS ESI +       |
| Monocrotophos           | 1.70                 | 224.1               | 65                     | 127.0                    | 10                   | 193.0                    | 0                    | AJS ESI +       |

Table S1 (continued)

| Compound            | Retention time (min) | Precursor ion (m/z) | Fragmentor voltage (V) | Transitions              |                      |                          |                      | Ionization mode |
|---------------------|----------------------|---------------------|------------------------|--------------------------|----------------------|--------------------------|----------------------|-----------------|
|                     |                      |                     |                        | Product ion (m/z) - SRM1 | Collision energy (V) | Product ion (m/z) - SRM2 | Collision energy (V) |                 |
| Myclobutanil        | 7.52                 | 289.1               | 110                    | 70.1                     | 16                   | 125.1                    | 32                   | AJS ESI +       |
| Nitempiram          | 1.66                 | 271.1               | 95                     | 90.0                     | 48                   | 126.1                    | 12                   | AJS ESI +       |
| <i>Ochratoxin A</i> | 7.26                 | 404.1               | 101                    | 220.9                    | 41                   | 238.5                    | 29                   | AJS ESI +       |
| Ofurace             | 6.61                 | 282.1               | 101                    | 148.0                    | 20                   | 160.0                    | 6                    | AJS ESI +       |
| Omethoate           | 1.63                 | 214.0               | 80                     | 109.0                    | 24                   | 125.0                    | 16                   | AJS ESI +       |
| Oxadixyl            | 5.62                 | 279.1               | 70                     | 132.3                    | 32                   | 219.2                    | 5                    | AJS ESI +       |
| Oxamyl              | 1.82                 | 237.1               | 60                     | 72.0                     | 12                   | 220.1                    | 0                    | AJS ESI +       |
| Paclobutrazol       | 7.16                 | 294.1               | 115                    | 70.1                     | 16                   | 125.2                    | 36                   | AJS ESI +       |
| Penconazole         | 8.07                 | 284.1               | 101                    | 70.1                     | 15                   | 158.9                    | 37                   | AJS ESI +       |
| Pencycuron          | 8.59                 | 329.1               | 120                    | 89.1                     | 60                   | 125.1                    | 24                   | AJS ESI +       |
| Pendimethalin       | 9.42                 | 282.1               | 85                     | 194.1                    | 16                   | 212.1                    | 4                    | AJS ESI +       |
| Phenothrin          | 10.70                | 351.2               | 91                     | 154.9                    | 37                   | 183.1                    | 21                   | AJS ESI +       |
| Phenthoate          | 8.36                 | 321.0               | 75                     | 91.0                     | 20                   | 247.1                    | 4                    | AJS ESI +       |
| Phosalon            | 8.59                 | 368.0               | 70                     | 110.9                    | 44                   | 182.0                    | 8                    | AJS ESI +       |
| Phosmet             | 7.44                 | 318.0               | 70                     | 133.0                    | 40                   | 160.0                    | 8                    | AJS ESI +       |
| Picoxystrobin       | 8.22                 | 368.1               | 70                     | 145.0                    | 20                   | 205.2                    | 4                    | AJS ESI +       |
| Piperonyl butoxide  | 9.16                 | 356.0               | 86                     | 119.0                    | 35                   | 177.0                    | 5                    | AJS ESI +       |
| Pirazophos          | 8.46                 | 374.1               | 121                    | 194.1                    | 37                   | 222.2                    | 21                   | AJS ESI +       |
| Pirimicarb          | 2.16                 | 239.1               | 100                    | 72.1                     | 20                   | 182.1                    | 12                   | AJS ESI +       |
| Pirimiphos-ethyl    | 9.31                 | 334.1               | 131                    | 182.0                    | 21                   | 198.1                    | 21                   | AJS ESI +       |
| Pirimiphos-methyl   | 8.59                 | 306.2               | 130                    | 108.1                    | 30                   | 164.1                    | 20                   | AJS ESI +       |
| Prochloraz          | 7.43                 | 376.0               | 70                     | 265.9                    | 12                   | 308.0                    | 4                    | AJS ESI +       |
| Profenofos          | 8.91                 | 373.0               | 126                    | 302.9                    | 17                   | 344.8                    | 9                    | AJS ESI +       |
| Prometryn           | 6.32                 | 242.1               | 121                    | 68.1                     | 53                   | 158.1                    | 25                   | AJS ESI +       |
| Propamocarb         | 1.64                 | 189.2               | 90                     | 102.0                    | 12                   | 144.0                    | 8                    | AJS ESI +       |
| Propanil            | 7.17                 | 218.0               | 91                     | 127.0                    | 24                   | 162.0                    | 14                   | AJS ESI +       |
| Propargite          | 9.58                 | 368.1               | 80                     | 175.2                    | 8                    | 231.2                    | 0                    | AJS ESI +       |
| Propham             | 6.99                 | 180.1               | 60                     | 120.0                    | 12                   | 138.1                    | 4                    | AJS ESI +       |
| Propiconazole       | 8.18                 | 342.1               | 115                    | 123.0                    | 60                   | 159.0                    | 32                   | AJS ESI +       |
| Propyzamide         | 7.68                 | 256.0               | 81                     | 172.9                    | 21                   | 190.0                    | 15                   | AJS ESI +       |
| Propoxur (I.I.S.)   | 6.20                 | 210.1               | 61                     | 153.1                    | 1                    | 168.0                    | 1                    | AJS ESI +       |
| Pyraclostrobin      | 8.46                 | 388.1               | 95                     | 163.1                    | 20                   | 193.8                    | 8                    | AJS ESI +       |
| Pyridaben           | 10.20                | 365.1               | 80                     | 147.2                    | 20                   | 309.1                    | 4                    | AJS ESI +       |
| Pyrimethanil        | 6.31                 | 200.1               | 120                    | 82.0                     | 25                   | 106.9                    | 20                   | AJS ESI +       |
| Pyriproxyfen        | 9.23                 | 322.2               | 110                    | 96.0                     | 12                   | 185.0                    | 20                   | AJS ESI +       |
| Quinalphos (P.I.S.) | 8.30                 | 299.0               | 90                     | 243.1                    | 12                   | 271.1                    | 8                    | AJS ESI +       |
| Quinoxifen          | 9.32                 | 308.0               | 175                    | 182.3                    | 13                   | 200.1                    | 17                   | AJS ESI +       |
| Simazine            | 5.76                 | 202.1               | 126                    | 104.0                    | 30                   | 132.0                    | 17                   | AJS ESI +       |
| Spinosyn A          | 6.94                 | 732.5               | 155                    | 98.1                     | 60                   | 142.1                    | 28                   | AJS ESI +       |
| Spinosyn D          | 7.22                 | 746.5               | 175                    | 141.8                    | 29                   | 142.4                    | 29                   | AJS ESI +       |
| Spirodiclofen       | 10.20                | 411.1               | 110                    | 71.2                     | 15                   | 313.0                    | 5                    | AJS ESI +       |
| Spiromesifen        | 10.10                | 371.2               | 120                    | 255.1                    | 24                   | 273.1                    | 12                   | AJS ESI +       |
| Spiroxamine         | 6.20                 | 298.3               | 125                    | 100.1                    | 32                   | 144.1                    | 16                   | AJS ESI +       |
| Tau-Fluvalinate     | 10.30                | 503.1               | 91                     | 181.1                    | 29                   | 207.9                    | 5                    | AJS ESI +       |
| Tebuconazole        | 7.78                 | 308.1               | 100                    | 115.2                    | 52                   | 124.9                    | 47                   | AJS ESI +       |
| Tebufenoxide        | 8.09                 | 353.2               | 95                     | 133.0                    | 16                   | 297.1                    | 0                    | AJS ESI +       |
| Tebufenpyrad        | 9.06                 | 334.2               | 145                    | 145.0                    | 37                   | 147.1                    | 24                   | AJS ESI +       |
| Tetrachlorvinphos   | 7.95                 | 364.9               | 120                    | 204.0                    | 49                   | 239.0                    | 17                   | AJS ESI +       |
| Tetraconazole       | 7.59                 | 372.0               | 130                    | 70.0                     | 20                   | 159.0                    | 36                   | AJS ESI +       |
| Tetramethrin        | 9.13                 | 332.2               | 100                    | 135.0                    | 15                   | 164.1                    | 15                   | AJS ESI +       |

Table S1 (continued)

| Compound           | Retention time (min) | Precursor ion (m/z) | Fragmentor voltage (V) | Transitions              |                      |                          |                      | Ionization mode |
|--------------------|----------------------|---------------------|------------------------|--------------------------|----------------------|--------------------------|----------------------|-----------------|
|                    |                      |                     |                        | Product ion (m/z) - SRM1 | Collision energy (V) | Product ion (m/z) - SRM2 | Collision energy (V) |                 |
| Thiabendazole      | 1.64                 | 202.0               | 130                    | 65.0                     | 52                   | 175.0                    | 24                   | AJS ESI +       |
| Thiacloprid        | 5.19                 | 253.0               | 100                    | 90.0                     | 40                   | 126.0                    | 16                   | AJS ESI +       |
| Thiamethoxam       | 1.98                 | 292.0               | 85                     | 181.1                    | 20                   | 211.1                    | 8                    | AJS ESI +       |
| Thiodicarb         | 6.04                 | 355.1               | 85                     | 88.1                     | 8                    | 108.1                    | 8                    | AJS ESI +       |
| Thiophanate-methyl | 5.92                 | 343.1               | 96                     | 92.9                     | 61                   | 151.1                    | 21                   | AJS ESI +       |
| Triadimefon        | 7.64                 | 294.1               | 90                     | 197.2                    | 8                    | 225.1                    | 20                   | AJS ESI +       |
| Triadimenol        | 7.16                 | 296.1               | 70                     | 99.1                     | 8                    | 227.2                    | 4                    | AJS ESI +       |
| Triazophos         | 7.88                 | 314.1               | 101                    | 118.9                    | 37                   | 162.0                    | 17                   | AJS ESI +       |
| Trifloxystrobin    | 8.70                 | 409.1               | 110                    | 186.0                    | 12                   | 206.1                    | 8                    | AJS ESI +       |
| Triflumizole       | 8.08                 | 346.1               | 85                     | 43.1                     | 20                   | 278.0                    | 4                    | AJS ESI +       |
| Triticonazole      | 7.32                 | 318.1               | 126                    | 69.9                     | 17                   | 124.9                    | 40                   | AJS ESI +       |
| <u>Zearalenone</u> | 7.33                 | 319.2               | 91                     | 127.8                    | 65                   | 301.2                    | 5                    | AJS ESI +       |
| Zoxamide           | 8.43                 | 336.0               | 120                    | 159.0                    | 44                   | 187.0                    | 16                   | AJS ESI +       |

I.I.S.: instrument internal standard; P.I.S.: procedure internal standard.
