# Supplementary material for: Improving analytical performance for pesticides and mycotoxins determination in Brazilian table olives: one extraction and one analysis
Source: Royal Society of Chemistry journal article supplement (doi:10.1039/d4ay00576g), 2024-01-01
Supplement: d4ay00576g3.pdf [file d4ay00576g3.pdf]

Table S2 Maximum Residue Limits (MRL) of pesticides for olives according to the Brazilian Health Regulatory Agency (ANVISA), European Union (EU) and method LOQ

| Pesticide               | MRL (mg kg <sup>-1</sup> ) |                  |                            |
|-------------------------|----------------------------|------------------|----------------------------|
|                         | ANVISA <sup>39</sup>       | EU <sup>40</sup> | LOQ (mg kg <sup>-1</sup> ) |
| Acephate                | n.a.c.                     | 0.01             | 0.01                       |
| Acetamiprid             | 0.1                        | 3                | 0.01                       |
| Acetochlor              | n.a.c.                     | 0.01             | 0.01                       |
| Aldicarbe sulfone       | banned                     | 0.02*            | 0.01                       |
| Aldicarbe sulfoxide     | banned                     | 0.02*            | n.f.r.                     |
| Atrazine                | n.a.c.                     | 0.05             | 0.01                       |
| Azamethiphos            | n.a.c.                     | not approved     | 0.01                       |
| Azinphos-methyl         | not approved               | 0.01             | 0.01                       |
| Azoxystrobin            | 0.3                        | 0.01             | 0.01                       |
| Benfuracarb             | n.a.c.                     | not approved     | n.f.r.                     |
| Bifenazate              | not approved               | 0.02             | 0.01                       |
| Bitertanol              | not approved               | 0.01             | 0.01                       |
| Boscalid                | 5                          | 0.01             | 0.01                       |
| Bromuconazol            | n.a.c.                     | 0.01             | 0.01                       |
| Bupirimate              | not approved               | 0.01             | 0.01                       |
| Buprofezin              | n.a.c.                     | 0.01             | 0.01                       |
| Cadusaphos              | n.a.c.                     | 0.01             | 0.01                       |
| Carbaryl                | n.a.c.                     | 0.01             | 0.01                       |
| Carbendazim             | n.a.c.                     | 0.1              | n.f.r.                     |
| Carbofuran              | banned                     | 0.003            | 0.01                       |
| Carpropamid             | not approved               | not approved     | 0.01                       |
| Chlorfenvinphos         | banned                     | 0.02             | 0.01                       |
| Chlorpyrifos            | n.a.c.                     | 0.01             | 0.02                       |
| Clofentezine            | not approved               | 0.02             | 0.05                       |
| Clothianidin            | n.a.c.                     | 0.09             | 0.01                       |
| Cyazofamid              | n.a.c.                     | 0.01             | 0.01                       |
| Cyproconazole           | n.a.c.                     | 0.05             | 0.01                       |
| Cyprodinil              | 1.5                        | 0.02             | 0.01                       |
| Demeton-S-methylsulfone | not approved               | not approved     | 0.01                       |
| Diazinon                | not approved               | 0.01             | 0.01                       |
| Dichlofluanid           | not approved               | 0.01             | 0.05                       |
| Diethofencarb           | not approved               | 0.01             | 0.01                       |
| Difenconazole           | 0.5                        | 2                | 0.01                       |
| Diphenylamine           | not approved               | 0.05             | 0.01                       |
| Diflubenzuron           | n.a.c.                     | 0.01             | 0.05                       |
| Dimethoate              | n.a.c.                     | 0.01             | 0.01                       |
| Dimethomorph            | n.a.c.                     | 0.01             | 0.01                       |
| Diniconazole            | not approved               | 0.01             | 0.01                       |
| Diuron                  | n.a.c.                     | 0.01             | 0.01                       |
| Epoxiconazole           | n.a.c.                     | 0.01             | 0.01                       |
| Ethion                  | not approved               | 0.01             | 0.01                       |
| Ethirimol               | not approved               | 0.01             | 0.01                       |
| Etofenprox              | n.a.c.                     | 0.01             | 0.01                       |
| Ethoprophos             | n.a.c.                     | 0.01             | 0.01                       |

Table S2 (continued)

| Pesticide               | MRL (mg kg <sup>-1</sup> ) |                  | LOQ (mg kg <sup>-1</sup> ) |
|-------------------------|----------------------------|------------------|----------------------------|
|                         | ANVISA <sup>39</sup>       | EU <sup>40</sup> |                            |
| Ethiprole               | n.a.c.                     | not approved     | 0.01                       |
| Etoazole                | n.a.c.                     | 0.01             | 0.01                       |
| Fenamidone              | n.a.c.                     | 0.01             | 0.01                       |
| Fenamiphos              | not approved               | 0.05             | 0.01                       |
| Fenarimol               | not approved               | 0.02             | 0.01                       |
| Fenazaquin              | not approved               | 0.01             | 0.01                       |
| Fenbuconazole           | not approved               | 0.01             | 0.01                       |
| Fenhexamid              | not approved               | 0.01             | 0.01                       |
| Fenobucarb              | not approved               | not approved     | 0.01                       |
| Fenoxycarb              | not approved               | 3                | 0.01                       |
| Fenpropimorph           | n.a.c.                     | 0.01             | 0.01                       |
| Fenpyroximate           | 0.01                       | 0.01             | 0.01                       |
| Fensulfothion           | banned                     | not approved     | 0.01                       |
| Fluazifop-butyl         | n.a.c.                     | 0.01             | 0.01                       |
| Fludioxonil             | n.a.c.                     | 0.01             | n.f.r.                     |
| Flufenoxuron            | n.a.c.                     | 0.01             | 0.01                       |
| Fluquiconazole          | n.a.c.                     | 0.01             | 0.01                       |
| Flusilazole             | not approved               | 0.01             | 0.01                       |
| Flutolanil              | n.a.c.                     | 0.01             | 0.01                       |
| Flutriafol              | 0.5                        | 0.01             | 0.01                       |
| Fostiazato              | n.a.c.                     | 0.02             | 0.01                       |
| Furalaxyl               | not approved               | not approved     | 0.01                       |
| Furathiocarb            | banned                     | not approved     | 0.01                       |
| Halofenozide            | not approved               | not approved     | 0.01                       |
| Haloxyfop-2-ethoxyethyl | not approved               | 0.01             | 0.01                       |
| Hexaconazole            | not approved               | 0.01             | 0.01                       |
| Hexythiazox             | n.a.c.                     | 0.01             | 0.01                       |
| Imazalil                | n.a.c.                     | 0.01             | 0.01                       |
| Imazapic                | n.a.c.                     | 0.01             | n.f.r.                     |
| Imidacloprid            | n.a.c.                     | 0.01             | 0.01                       |
| Indoxacarb              | banned                     | 0.02             | 0.01                       |
| Iprovalicarb            | not approved               | 0.01             | 0.01                       |
| Kresoxim-methyl         | 1.5                        | 0.2              | 0.01                       |
| Linuron                 | n.a.c.                     | 0.01             | 0.01                       |
| Malathion               | n.a.c.                     | 0.02             | 0.01                       |
| Mecarbam                | not approved               | 0.01             | 0.01                       |
| Mepanipyrim             | not approved               | 0.01             | 0.01                       |
| Metalaxil               | banned                     | 0.05             | 0.01                       |
| Metconazole             | n.a.c.                     | 0.02             | 0.01                       |
| Methamidophos           | banned                     | 0.01             | 0.01                       |
| Methidathion            | n.a.c.                     | 0.02             | 0.01                       |
| Methiocarb              | not approved               | 0.03**           | 0.01                       |
| Methiocarb sulfone      | not approved               | 0.03**           | 0.01                       |
| Methiocarb sulfoxide    | not approved               | 0.03**           | n.d.                       |

Table S2 (continued)

| Pesticide          | MRL (mg kg <sup>-1</sup> ) |                              |                            |
|--------------------|----------------------------|------------------------------|----------------------------|
|                    | ANVISA <sup>39</sup>       | EU <sup>40</sup>             | LOQ (mg kg <sup>-1</sup> ) |
| Methomyl           | n.a.c.                     | 0.01                         | 0.01                       |
| Methoxyfenozide    | n.a.c.                     | 0.01                         | n.f.r.                     |
| Monocrotophos      | banned                     | 0.01                         | 0.01                       |
| Myclobutanil       | n.a.c.                     | 0.01                         | 0.01                       |
| Nitenpyram         | not approved               | not approved                 | 0.01                       |
| Ofurace            | not approved               | not approved                 | 0.01                       |
| Omethoate          | banned                     | 0.01                         | 0.01                       |
| Oxadixyl           | banned                     | 0.01                         | 0.01                       |
| Oxamyl             | banned                     | 0.01                         | 0.01                       |
| Paclobutrazol      | n.a.c.                     | 0.01                         | 0.01                       |
| Penconazole        | not approved               | 0.01                         | 0.01                       |
| Pencycuron         | n.a.c.                     | 0.02                         | 0.01                       |
| Pendimethalin      | n.a.c.                     | 0.05                         | 0.01                       |
| Phenothrin         | n.a.c.                     | 0.02                         | 0.01                       |
| Phenthoate         | not approved               | not approved                 | n.d.                       |
| Phosalon           | banned                     | 0.01                         | 0.02                       |
| Phosmet            | n.a.c.                     | 0.01                         | 0.01                       |
| Picoxystrobin      | 1.5                        | 0.01                         | 0.01                       |
| Piperonyl butoxide | not approved               | not yet assesses at EU level | 0.01                       |
| Pirazophos         | banned                     | 0.01                         | 0.01                       |
| Pirimicarb         | not approved               | 0.01                         | n.f.r.                     |
| Pirimiphos-methyl  | n.a.c.                     | 0.01                         | 0.01                       |
| Pirimiphos-ethyl   | not approved               | not approved                 | 0.01                       |
| Prochloraz         | banned                     | 0.03                         | 0.01                       |
| Profenofos         | n.a.c.                     | 0.01                         | 0.01                       |
| Prometryn          | n.a.c.                     | not approved                 | 0.01                       |
| Propamocarb        | n.a.c.                     | 0.01                         | n.f.r.                     |
| Propanil           | n.a.c.                     | 0.01                         | 0.05                       |
| Propargite         | 0.04                       | 0.01                         | 0.01                       |
| Propham            | not approved               | 0.01                         | 0.01                       |
| Propiconazole      | n.a.c.                     | 0.01                         | 0.01                       |
| Propyzamide        | not approved               | 0.01                         | 0.01                       |
| Pyraclostrobin     | 1.5                        | 0.02                         | 0.01                       |
| Pyridaben          | n.a.c.                     | 0.01                         | 0.01                       |
| Pyrimethanil       | n.a.c.                     | 0.02                         | 0.01                       |
| Pyriproxyfen       | n.a.c.                     | 0.05                         | 0.01                       |
| Quinoxifen         | not approved               | 0.02                         | 0.01                       |
| Simazine           | n.a.c.                     | 0.01                         | 0.01                       |
| Spinosyn D         | n.a.c.                     | 0.02***                      | 0.01                       |
| Spinosyn A         | n.a.c.                     | 0.02***                      | 0.01                       |
| Spirodiclofen      | n.a.c.                     | 0.02                         | 0.01                       |
| Spiromesifen       | n.a.c.                     | 0.02                         | 0.01                       |
| Spiroxamine        | not approved               | 0.01                         | 0.01                       |
| Tau-Fluvalinate    | banned                     | 0.01                         | 0.01                       |

Table S2 (continued)

| Pesticide          | MRL (mg kg <sup>-1</sup> ) |                  |  | LOQ (mg kg <sup>-1</sup> ) |
|--------------------|----------------------------|------------------|--|----------------------------|
|                    | ANVISA <sup>39</sup>       | EU <sup>40</sup> |  |                            |
| Tebuconazole       | n.a.c.                     | 0.5              |  | 0.01                       |
| Tebufenoxide       | n.a.c.                     | 0.01             |  | 0.01                       |
| Tebufenpyrad       | not approved               | 0.01             |  | 0.01                       |
| Tetrachlorvinphos  | not approved               | not approved     |  | 0.01                       |
| Tetraconazole      | n.a.c.                     | 0.01             |  | 0.01                       |
| Tetramethrin       | n.a.c.                     | not approved     |  | 0.01                       |
| Thiabendazole      | n.a.c.                     | 0.01             |  | 0.01                       |
| Thiacloprid        | n.a.c.                     | 4                |  | 0.01                       |
| Thiamethoxam       | n.a.c.                     | 0.4              |  | n.f.r.                     |
| Thiodicarb         | n.a.c.                     | 0.01             |  | 0.01                       |
| Thiophanate-methyl | 0.5                        | 0.1              |  | n.f.r.                     |
| Triadimefon        | not approved               | 0.01             |  | 0.01                       |
| Triadimenol        | n.a.c.                     | 0.01             |  | 0.05                       |
| Triazophos         | not approved               | 0.01             |  | 0.01                       |
| Trifloxystrobin    | n.a.c.                     | 0.3              |  | 0.01                       |
| Triflumizole       | n.a.c.                     | 0.02             |  | 0.01                       |
| Triticonazole      | n.a.c.                     | 0.01             |  | 0.01                       |
| Zoxamide           | n.a.c.                     | 0.02             |  | 0.01                       |

n.a.c.: not allowed for the crop

\*sum of aldicarb, its sulfoxide and its sulfone, expressed as aldicarb

\*\*sum of methiocarb and methiocarb sulfoxide and sulfone, expressed as methiocarb

\*\*\*spinosad, sum of spinosyn A and spinosyn D
